# Supplementary material for: Photoelectrochemical lab-on-paper device based on molecularly imprinted polymer and porous Au-paper electrode
Source: Royal Society of Chemistry journal article supplement (doi:10.1039/c3an00694h), 2013-01-01
Supplement: c3an00694h.pdf [file c3an00694h.pdf]

## Supplemental Information

### Photoelectrochemical Lab-on-Paper Device Based on Molecularly Imprinted Polymer and Porous Au-paper Electrode

Panpan Wang<sup>a</sup>, Guoqiang Sun<sup>a</sup>, Lei Ge<sup>a</sup>, Shenguang Ge<sup>b</sup>, Jinghua Yu<sup>a</sup>, Mei Yan<sup>\*a</sup>

<sup>a</sup>Key Laboratory of Chemical Sensing & Analysis in Universities of Shandong (University of Jinan), School of Chemistry and Chemical Engineering, University of Jinan, Jinan 250022, P.R. China

<sup>b</sup>Shandong Provincial Key Laboratory of Preparation and Measurement of Building Materials, University of Jinan, Jinan 250022, P. R. China

#### The stability of the $\mu$ -MPECOD

Table S1 The data of the experiments for 50 analysis repetitions.

| $C_{\text{heptachlor}}$ (nmol·L <sup>-1</sup> ) | Photocurrent ( $\mu$ A)                                               |
|-------------------------------------------------|-----------------------------------------------------------------------|
| 0.5                                             | 33.55, 33.55, 33.54, 33.56, 33.56, 33.52, 33.51, 33.54, 33.54, 33.51, |
|                                                 | 33.55, 33.54, 33.52, 33.52, 33.53, 33.54, 33.53, 33.54, 33.51, 33.52, |
|                                                 | 33.47, 33.49, 33.46, 33.49, 33.47, 33.46, 33.45, 33.45, 33.46, 33.48, |
|                                                 | 33.46, 33.42, 33.40, 33.41, 33.43, 33.42, 33.41, 33.39, 33.37, 33.38, |
|                                                 | 33.37, 33.36, 33.32, 33.34, 33.33, 33.32, 33.31, 33.30, 33.29, 33.28  |

Furthermore, to adequately validate and confirm the applicability and sensitivity of this  $\mu$ -MPECOD from 0.03 nmol·L<sup>-1</sup> to 10.0 nmol·L<sup>-1</sup>, spiked milk samples were prepared through adding different amounts of heptachlor (0.03 to 10 nmol·L<sup>-1</sup>) into the milk sample. The results are

shown in Table S2, and acceptable recovery (96.4-104%) and RSD (less than 5.0%) data were obtained. Hence, the developed  $\mu$ -MPECOD provided a possible application for the detection of heptachlor in real samples.

Table S2. Recovery of Heptachlor in milk Samples

| sample | $C_{\text{heptachlor}}$<br>( $\text{nmol}\cdot\text{L}^{-1}$ ) | added<br>( $\text{nmol}\cdot\text{L}^{-1}$ ) | detected<br>( $\text{nmol}\cdot\text{L}^{-1}$ ) | found<br>( $\text{nmol}\cdot\text{L}^{-1}$ ) <sup>a</sup> | RSD (%,<br>n = 11) | recovery<br>(%) |
|--------|----------------------------------------------------------------|----------------------------------------------|-------------------------------------------------|-----------------------------------------------------------|--------------------|-----------------|
| 1      | 1                                                              | 0.03                                         | 1.032                                           | 0.031                                                     | 4.8                | 103.3           |
| 2      |                                                                | 0.5                                          | 1.54                                            | 0.53                                                      | 4.2                | 104             |
| 3      |                                                                | 1                                            | 1.97                                            | 0.97                                                      | 3.1                | 97              |
| 4      |                                                                | 2.5                                          | 3.47                                            | 2.41                                                      | 3.8                | 96.4            |
| 5      |                                                                | 5                                            | 6.09                                            | 5.12                                                      | 4.6                | 102.4           |
| 6      |                                                                | 7.5                                          | 8.37                                            | 7.31                                                      | 3.6                | 97.5            |
| 7      |                                                                | 9                                            | 9.85                                            | 8.74                                                      | 4.4                | 97.1            |

<sup>a</sup>[found] means the values obtained by subtracting the intrinsic value of [heptachlor] in the milk sample (here 1  $\text{nmol}\cdot\text{L}^{-1}$ ) from the [detected] value in the spiked milk sample.
